# Supplementary material
Source: PubMed Central journal article supplement (PMC6641431)
Supplement: ao7b01746_si_001.pdf [file ao7b01746_si_001.pdf]

# Molecular dual-rotators with large consecutive emission chromism for visualized and high pressure sensing

*Kangming Tan,<sup>[a, b]</sup> Yan Zeng,<sup>[a, c]</sup> Lei Su,<sup>[a]</sup> Shuangqing Wang,<sup>[a]</sup> Xudong Guo,<sup>[a]</sup> Qingxu Li,<sup>[c]</sup> Linghai Xie,<sup>[b]</sup> Yan Qian,<sup>\*[b]</sup> Yuanping Yi,<sup>\*[a]</sup> Wei Huang,<sup>[b]</sup> and Guoqiang Yang<sup>\*[a]</sup>*

<sup>a</sup>Key laboratory of Photochemistry and Key Laboratory of Organic Solids, Institute of Chemistry, University of Chinese Academy of Sciences, Chinese Academy of Sciences, Beijing 100190, China

<sup>b</sup>Key Laboratory for Organic Electronics and Information Displays & Institute of Advanced Materials (IAM), Jiangsu National Synergetic Innovation Center for Advanced Materials (SICAM), Nanjing University of Posts & Telecommunications (NUPT), 9 Wenyuan Road, Nanjing 210023, China

<sup>c</sup>School of Science, Chongqing University of Posts and Telecommunications, Chongqing, 400065, China

## AUTHOR INFORMATION

### Corresponding Author

E-mail: iamyqian@njupt.edu.cn, ypyi@iccas.ac.cn, gqyang@iccas.ac.cn

## 1. Emission spectra and photographs during the pressure-decompressed process

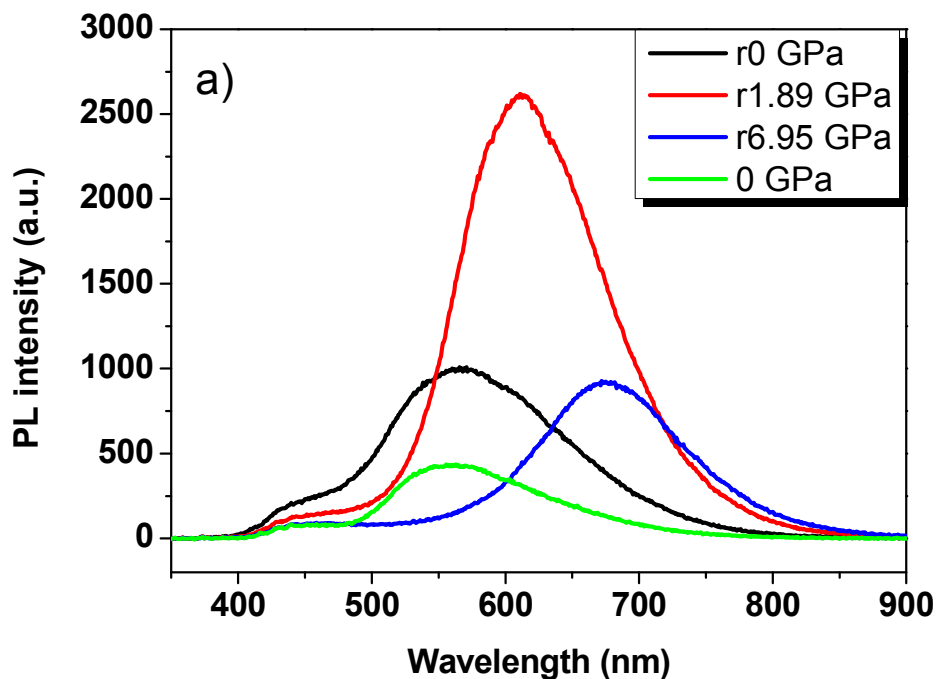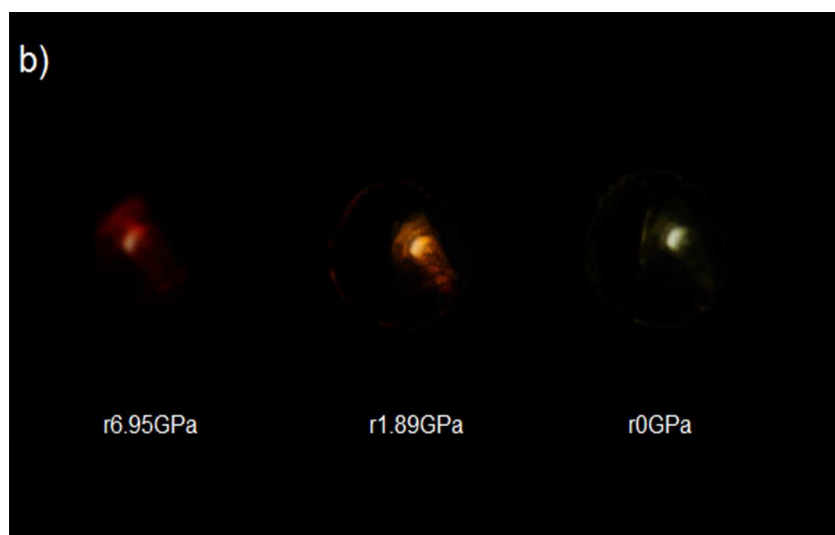

Figure S1. (a) Pressure-dependent fluorescence spectra and (b) Photographic images of DAAD film (0.5 wt% dispersed in PMMA matrix) under different pressures during the pressure-decompressed process (The images were obtained by Canon EOS 5D Mark II). The emission maximums at r6.95, r1.80 and r0 GPa were 675, 612 and 566 nm, respectively.

## 2. Pressure-dependent fluorescence spectra of DAAD dispersed in PS matrix

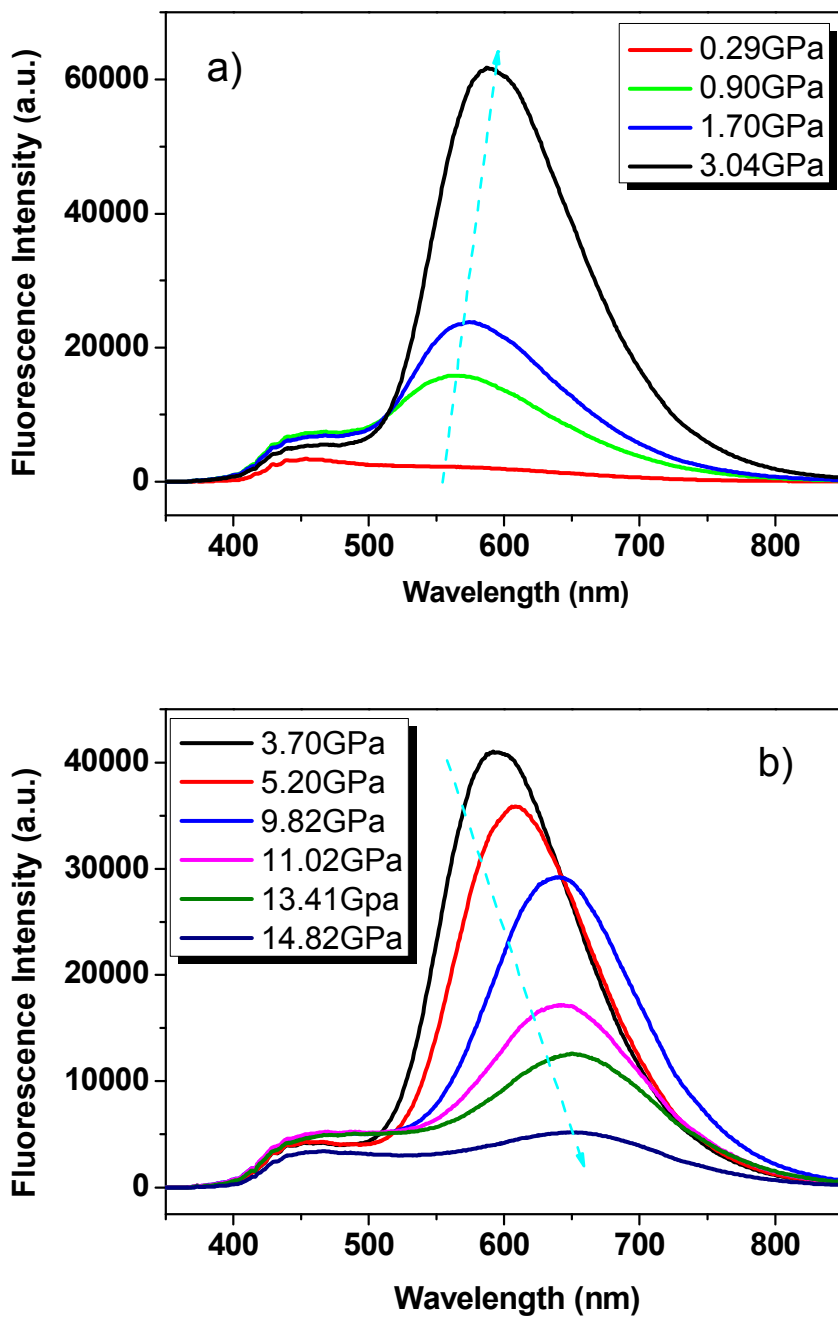

**Figure S2.** Pressure-dependent fluorescence spectra of DAAD film (0.5 wt% dispersed in PS matrix): (a) emission increasing process; (b) emission decreasing process. The emission peaked around 450 nm is caused by the intrinsic emission from the diamond.

### 3. Pressure-dependent PXRD patterns of DAAD powder

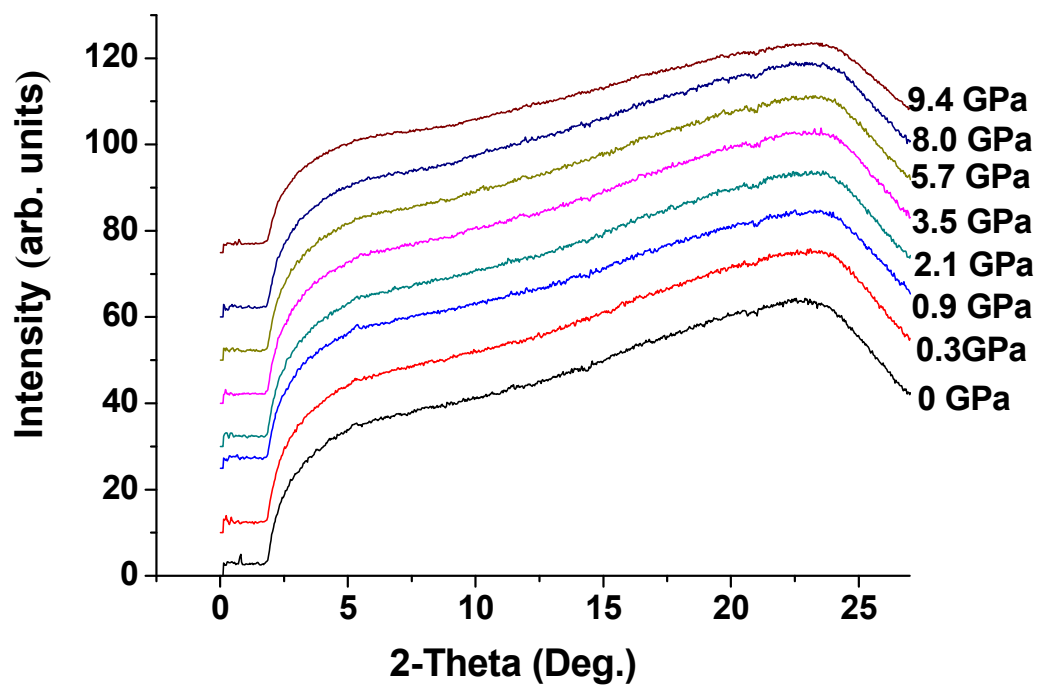

Figure S3. Pressure-dependent PXRD patterns of DAAD powder.

4. Evolution of the  $S_1$  and  $T_1$  excitation energies at the optimized  $S_1$  state as a function of  $\theta_2$

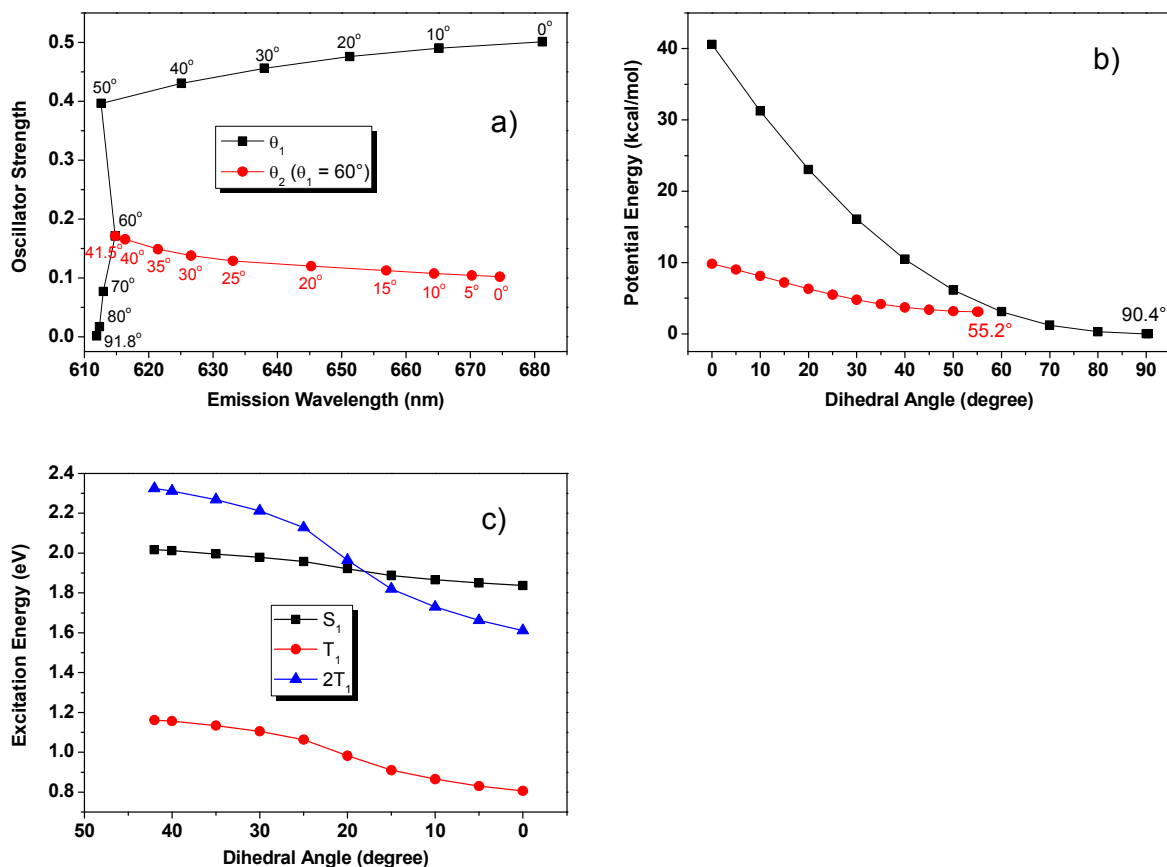

**Figure S3.** a) Vertical emission wavelengths and oscillator strengths of the  $S_1$  state optimized at different dihedral angles of  $\theta_1$  and  $\theta_2$  (black: only  $\theta_1$  is fixed at different angles; blue:  $\theta_2$  decreases from the optimal angle of  $48.1^\circ$  to  $0^\circ$  with  $\theta_1$  kept at  $50^\circ$ ); c) Relative potential energies of the ground state optimized at different dihedral angles of  $\theta_1$  and  $\theta_2$  (black: only  $\theta_1$  is fixed at different angles; red:  $\theta_2$  decrease from the optimal angle of  $55.2^\circ$  to  $0^\circ$  with  $\theta_1$  kept at  $60^\circ$ ). b) Evolution of the  $S_1$  and  $T_1$  excitation energies at the optimized  $S_1$  state as a function of the dihedral angle  $\theta_2$  when the dihedral angle  $\theta_1$  is fixed at  $50^\circ$ ); c) Evolution of the  $S_1$  and  $T_1$  excitation energies at the optimized  $S_1$  state as a function of the dihedral angle  $\theta_2$  when the dihedral angle  $\theta_1$  is fixed at  $60^\circ$ , respectively.
